# Supplementary material for: Epigenetic Modifications of White Blood Cell DNA Caused by Transient Fetal Infection with Bovine Viral Diarrhea Virus
Source: Viruses. 2024 May 1;16(5):721. doi: 10.3390/v16050721 (PMC11125956; doi:10.3390/v16050721)
Supplement: Supplementary file 1 [file viruses-16-00721-s001.zip]

Archive with 6 entries (6 files):
- Figure S1 BVDV RTPCR hvc  04202024.pdf
- Figure S2 D0  IPA Canonical Pathways.jpg
- Figure S3 D0 Cardiac Hypertrophy Signaling (Enhanced).jpg
- Figure S4 Osteoclast.pdf
- Figure S5 Chondrocytes March 11.pdf
- Figure S6 D0 KEGG Analysis of Cytokine-Cytokine Receptor Signaling.pdf
