# Supplementary material for: Epigenetic Modifications of White Blood Cell DNA Caused by Transient Fetal Infection with Bovine Viral Diarrhea Virus
Source: Viruses. 2024 May 1;16(5):721. doi: 10.3390/v16050721 (PMC11125956; doi:10.3390/v16050721)

# CYTOKINE-CYTOKINE RECEPTOR INTERACTION

## Chemokines

### CC subfamily

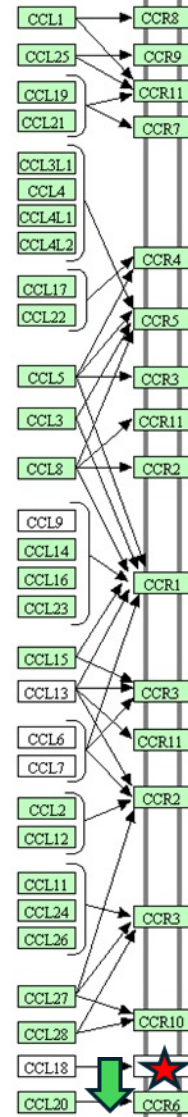

### CXC subfamily

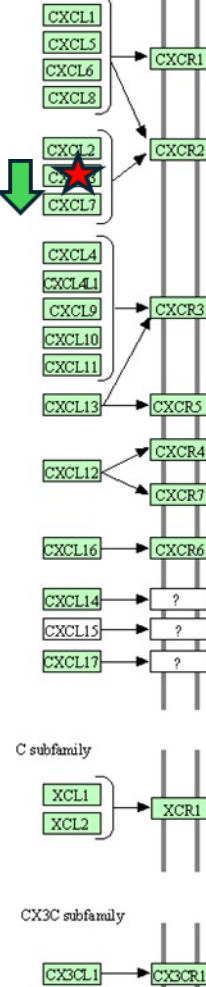

## The class I helical cytokines γ-chain utilising

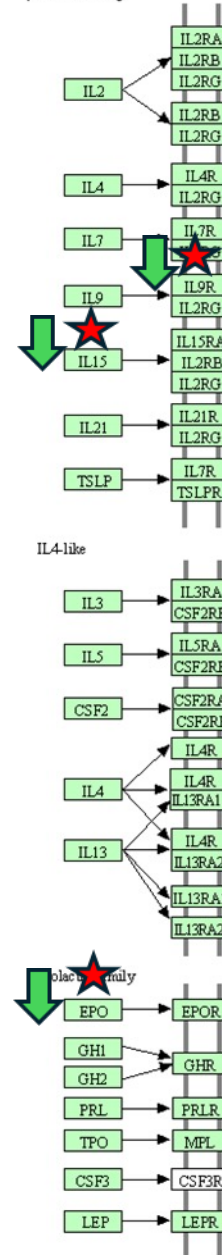

## IL6/12-like

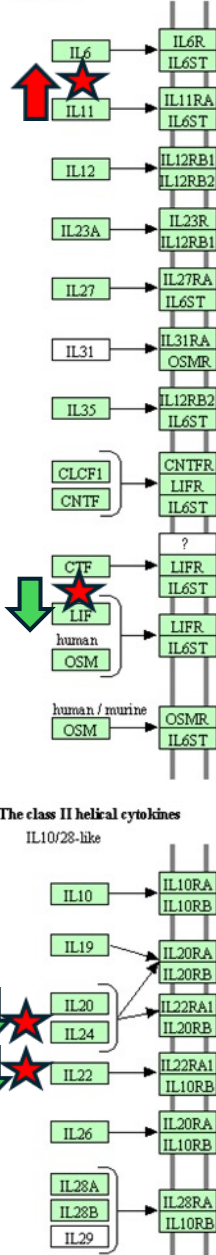

## The class II helical cytokines IL10/28-like

## Interferon family

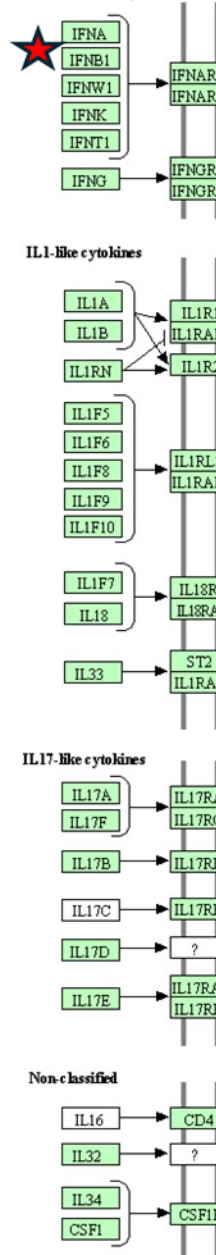

## TNF Family

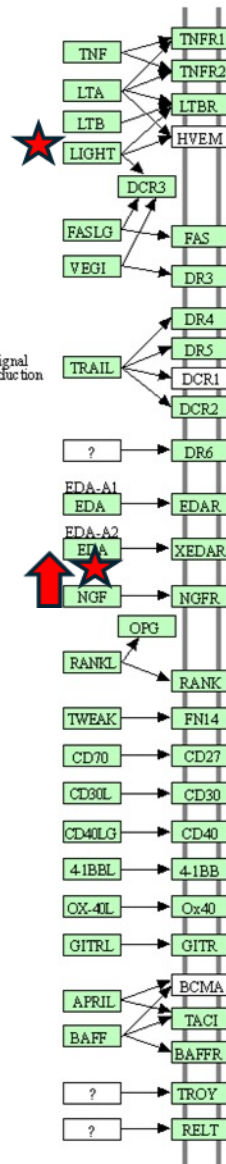

## TGF-β family

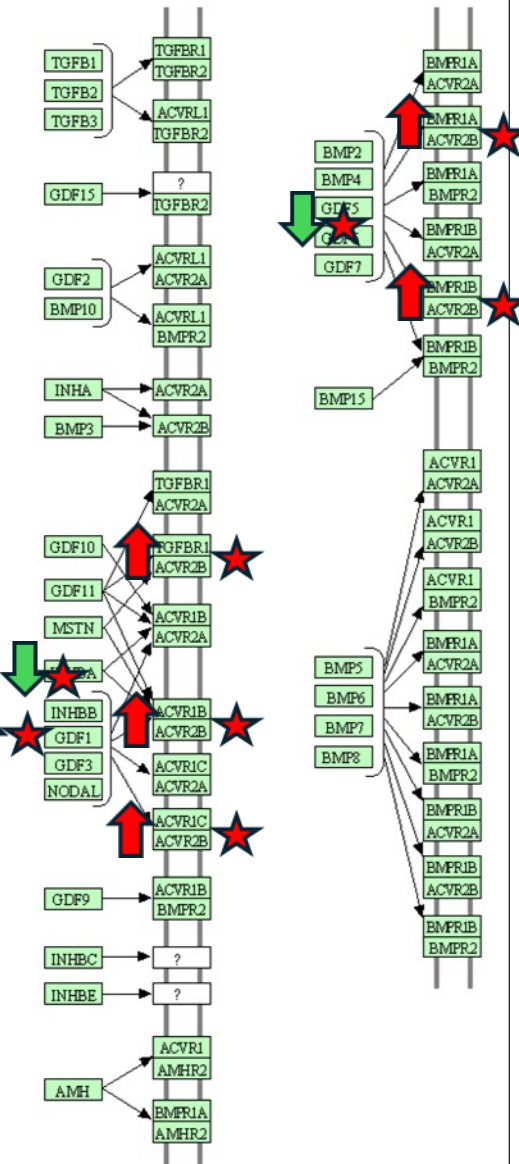

Supplement: Supplementary file 1 [file viruses-16-00721-s001.zip › Figure S6 D0 KEGG Analysis of Cytokine-Cytokine Receptor Signaling.pdf]
