# Supplementary figures and images for: Epigenetic Modifications of White Blood Cell DNA Caused by Transient Fetal Infection with Bovine Viral Diarrhea Virus
Source: MDPI journal article supplement (doi:10.3390/v16050721), 2024-05-01

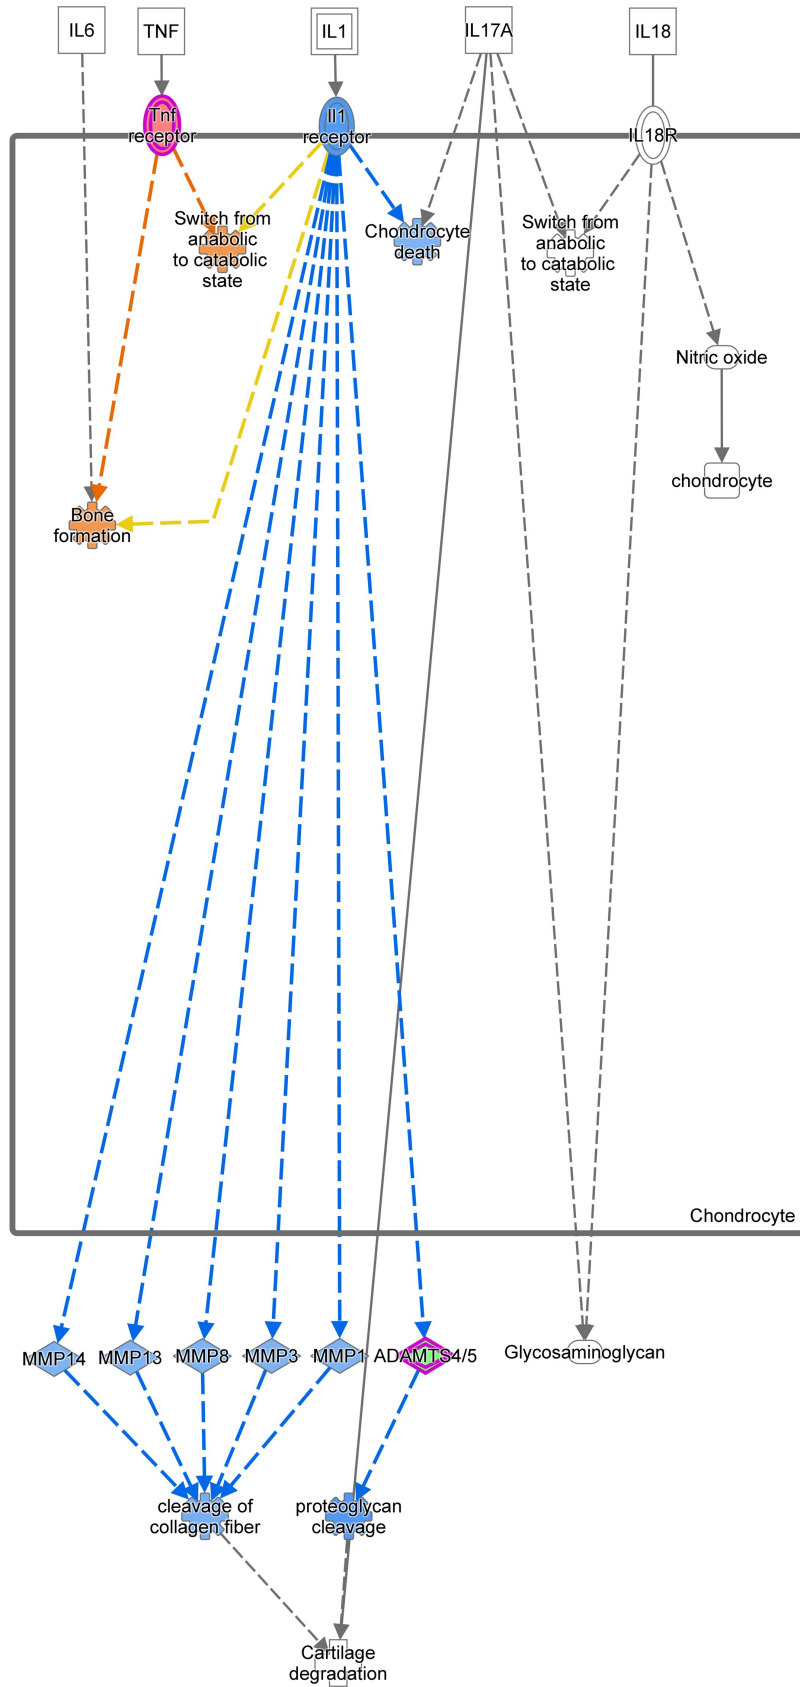

Supplement: s1 [file s1]

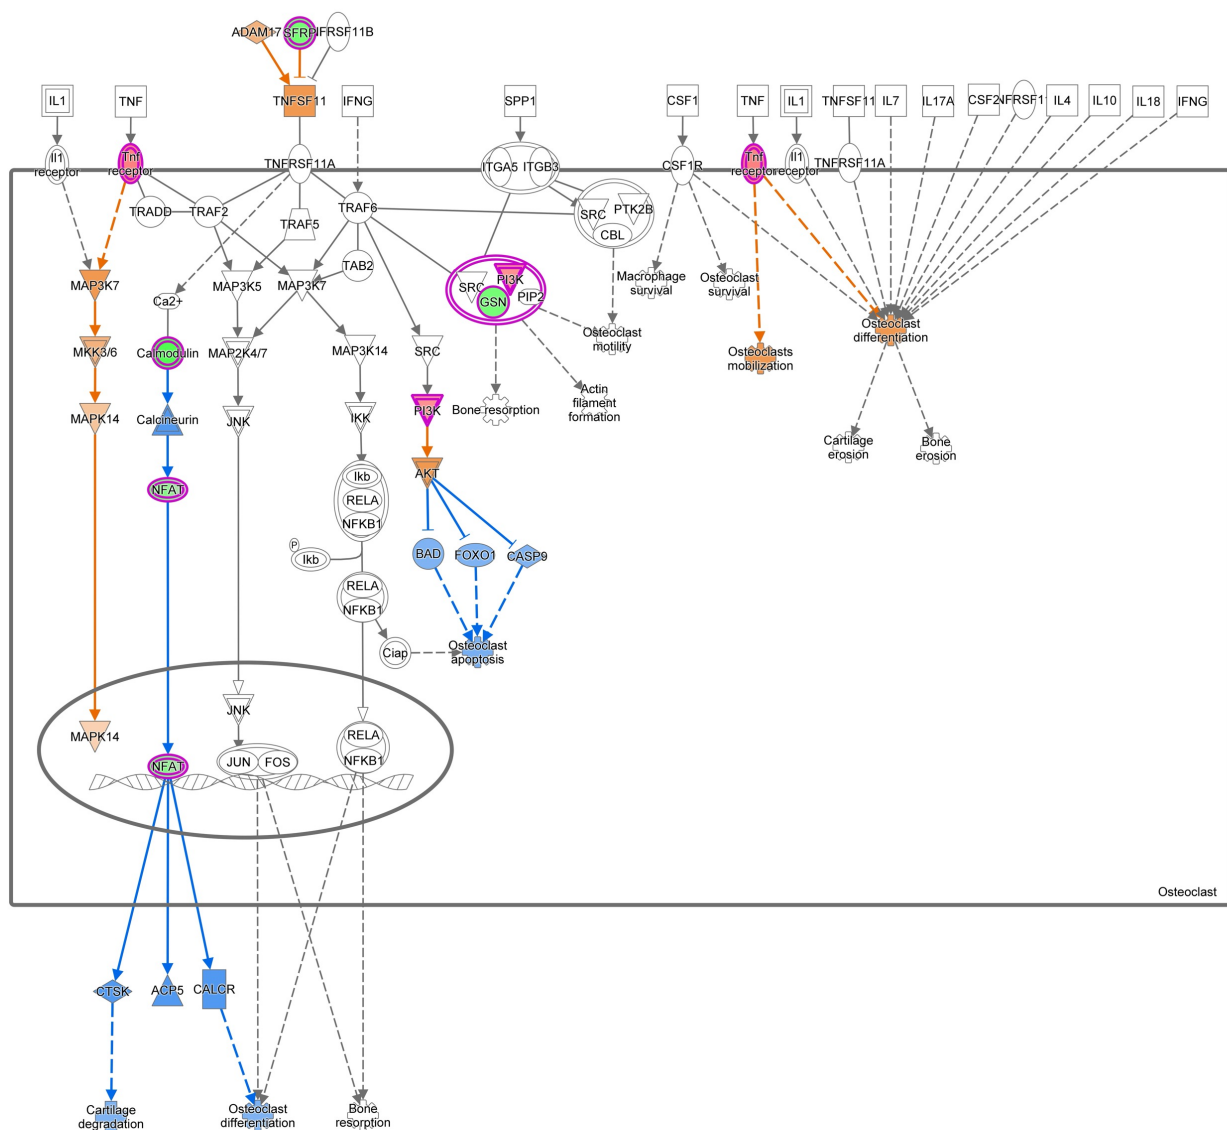

Supplement: s1 [file s1]
